# Supplementary material
Source: publisher figshare collection journal article supplement (https://acs.figshare.com/ndownloader/files/8956900)
Supplement: Supplementary file 1 [file 8956900]

Supporting information

## **Ultrasound-Responsive Polymeric Micelles for Sonoporation-Assisted**

### **Site-Specific Therapeutic Action**

Pengying Wu<sup>#,†</sup>, Yali Jia<sup>#,†</sup>, Fei Qu<sup>†</sup>, Yue Sun<sup>†</sup>, Pan Wang<sup>†</sup>, Kun Zhang<sup>†</sup>, Chuanshan Xu<sup>\*,‡</sup>, Quanhong Liu<sup>†</sup>, and Xiaobing Wang<sup>\*†</sup>

<sup>#</sup> Co-first author.

<sup>†</sup> Key Laboratory of Medicinal Resources and Natural Pharmaceutical Chemistry, Ministry of Education, College of Life Sciences, Shaanxi Normal University, Xi'an, Shaanxi 710119, China.

<sup>‡</sup> School of Chinese Medicine, Faculty of Medicine, The Chinese University of Hong Kong, Shatin, Hong Kong 999077, China

<sup>\*</sup> Corresponding Authors' email addresses: wangxiaobing@snnu.edu.cn (Xiaobing Wang), xcshan@163.com (Chuanshan Xu)

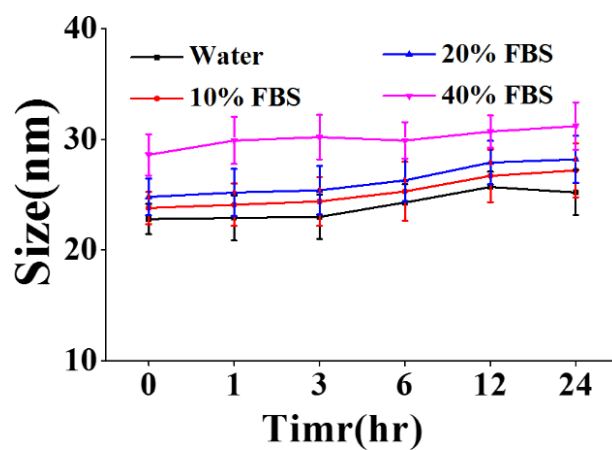

Figure S1. Time-dependent colloidal stability of Cur-M in PBS containing 10%, 20%, or 40% FBS at 37 °C. Data expressed as mean  $\pm$  SD of three batches.

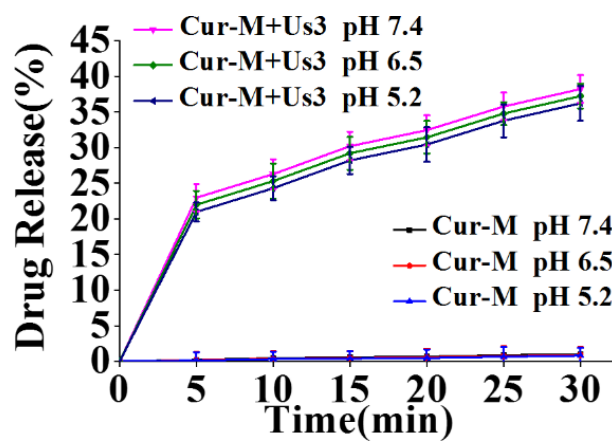

Figure S2. Drug release in different pH and physiological conditions in the absence and presence of Us treatment. Data expressed as mean  $\pm$  SD of three batches.

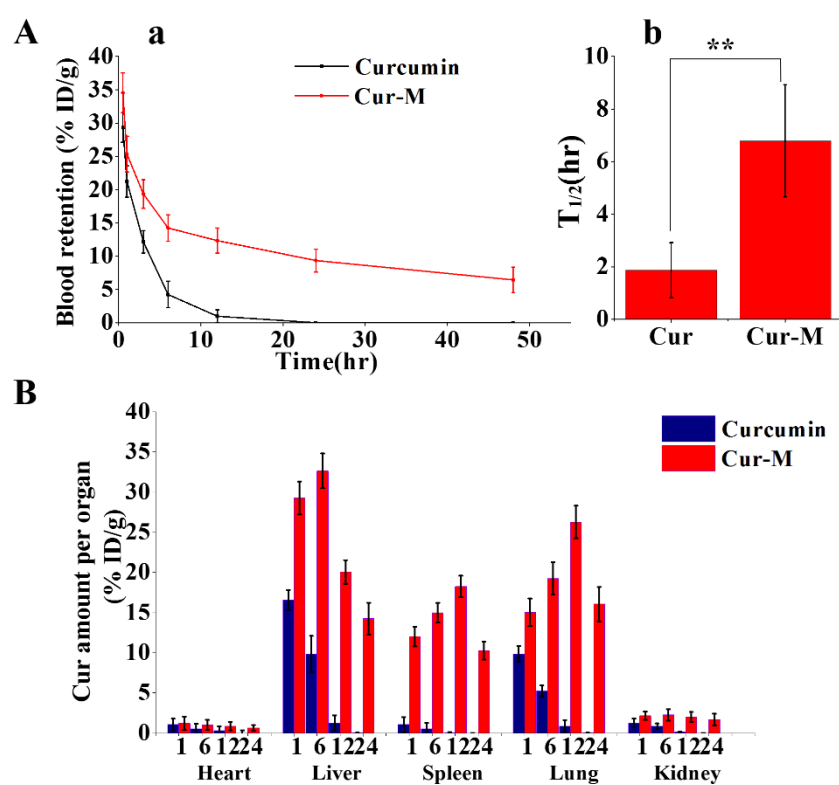

Figure S3. *In vivo* long circulating test. (Aa) Plasma concentration-time profiles of Cur in moues after administration of distinct drug formulations at the Cur dose of 50 mg/kg. (Ab) Half-life of Cur-M and free Cur. \*\*  $p < 0.01$  between groups. (B) Quantitative analysis of Cur and Cur-M at 1, 6, 12 and 24 h after intravenous administration. Data expressed as mean  $\pm$  SD of three batches.

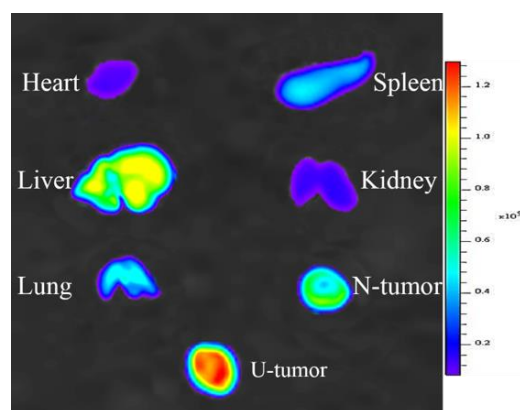

Figure S4. NIR fluorescence images of major organs and tumors in 4T1 bearing mice after intravenous injection of DiR-M.

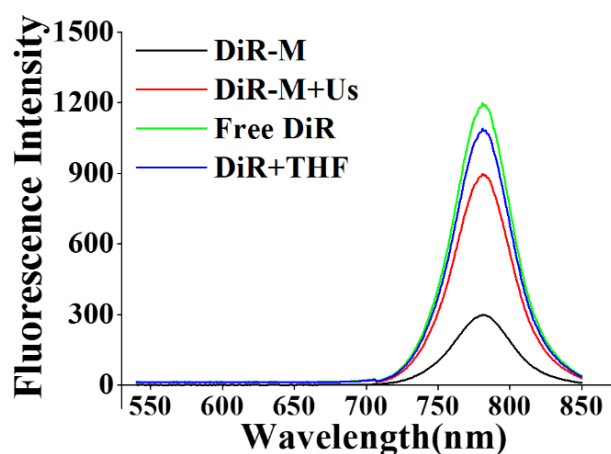

Figure S5. Fluorescence changes under different conditions (DiR-M, 50  $\mu\text{g/ml}$  DiR in P123/F127 micelles; DiR-M+Us, 50  $\mu\text{g/ml}$  DiR in P123/F127 micelles with Us3 treatment; free DiR, 50  $\mu\text{g/ml}$  free DiR; DiR+THF, 50  $\mu\text{g/ml}$  DiR in P123/F127 micelles with THF dissolution).
